# Supplementary material for: Improving Quality of Life, Mental Health, and Reducing Complications in Nasopharyngeal Carcinoma Patients Undergoing Chemoradiotherapy: A Randomized Controlled Trial of the Omaha System Nursing Model
Source: Research Square preprint supplement (doi:10.21203/rs.3.rs-6354392/v1), 2025-06-02
Supplement: Supplementary file 1 [file 0c2fa2588edfa34d66f3c205.docx]

| **Table 4. Comparison of complications between the two groups before and after nursing** | | | | | | | | | | | | | | | |
| --- | --- | --- | --- | --- | --- | --- | --- | --- | --- | --- | --- | --- | --- | --- | --- |
| Group | n | Nasal mucosal reaction | |  | Difficulty opening mouth | |  | Oral infection | |  | Limited neck movement | |  | Total complications | |
| n | % |  | n | % |  | n | % |  | n | % |  | n | % |
| Experimental group | 178 | 5 | 2.81 |  | 10 | 5.62 |  | 5 | 2.81 |  | 14 | 7.87 |  | 34 | 19.10 |
| Control group | 178 | 21 | 11.80 |  | 19 | 10.67 |  | 20 | 11.24 |  | 23 | 12.92 |  | 83 | 46.63 |
| ***x2*** |  | 10.622 | |  | 3.041 | |  | 9.680 | |  | 2.443 | |  | 30.567 | |
| ***P*** |  | 0.001 | |  | 0.081 | |  | 0.002 | |  | 0.118 | |  | 0.000 | |
