# Supplementary material for: Improving Quality of Life, Mental Health, and Reducing Complications in Nasopharyngeal Carcinoma Patients Undergoing Chemoradiotherapy: A Randomized Controlled Trial of the Omaha System Nursing Model
Source: Research Square preprint supplement (doi:10.21203/rs.3.rs-6354392/v1), 2025-06-02
Supplement: Supplementary file 2 [file 79fe193fb021ce85ad0ed54b.docx]

| **Table 1. Comparison of general data between the two groups** | | | | |
| --- | --- | --- | --- | --- |
| Variable | Experimental group(n=178) | Control group(n=178) | x2/t | *P* |
| **Gender** |  |  |  |  |
| Male | 81 | 86 | 0.282 | 0.595 |
| Female | 97 | 92 |
| **Age** | 48.63±14.78 | 45.76 ± 13.58 | 1.907 | 0.058 |
| **Marital status** |  |  |  |  |
| Married | 171 | 172 | 0.286 | 0.867 |
| Unmarried | 3 | 4 |
| Divorced or widowed | 4 | 2 |
| **WHO grade** |  |  |  |  |
| I&II | 34 | 36 | 0.183 | 0.912 |
| III | 101 | 97 |
| IV | 43 | 45 |
| **ECOG** |  |  |  |  |
| 0 | 51 | 62 | 1.569 | 0.210 |
| 1 | 127 | 116 |
| **EBV-DNA(copies/ml)** |  |  |  |  |
| ＜4000 | 107 | 121 | 2.391 | 0.122 |
| ≥4000 | 71 | 57 |
| **Residence** |  |  |  |  |
| Countryside | 42 | 37 | 0.723 | 0.697 |
| Suburb | 61 | 68 |
| Urban | 75 | 73 |
| **Payor** |  |  |  |  |
| Health insurance | 163 | 157 | 1.113 | 0.292 |
| Self | 15 | 21 |
| **Living conditions** |  |  |  |  |
| Alone | 32 | 26 | 0.741 | 0.389 |
| Live with families | 146 | 152 |
