# Supplementary material for: Improving Quality of Life, Mental Health, and Reducing Complications in Nasopharyngeal Carcinoma Patients Undergoing Chemoradiotherapy: A Randomized Controlled Trial of the Omaha System Nursing Model
Source: Research Square preprint supplement (doi:10.21203/rs.3.rs-6354392/v1), 2025-06-02
Supplement: Supplementary file 3 [file e023a5f600ba72db4b555217.docx]

| **Table 2. Comparison of quality of life scores between the two groups before and after nursing(x ̅± s)** | | | | | | | | | | | | | | | | | | | | | | | | |
| --- | --- | --- | --- | --- | --- | --- | --- | --- | --- | --- | --- | --- | --- | --- | --- | --- | --- | --- | --- | --- | --- | --- | --- | --- |
| **Quality of life** | **Experimental group(n=178)** | | | | | | | |  | **Control group(n=178)** | | | | | | | | |  | **Between groups** | | | | |
| BN1 | |  | AN1 | |  | Within group | |  | | BN2 | |  | AN2 | |  | Within group | |  | BN1 Experimental vs. BN2 Control | |  | AN1 Experimental vs. AN2 Control | |
| Mean | SD |  | Mean | SD |  | *t* | P |  | | Mean | SD |  | Mean | SD |  | *t* | P |  | *t* | P |  | *t* | P |
| Somatic function | 62.52 | 7.26 |  | 70.36 | 3.28 |  | -13.129 | 0.000 |  | | 61.46 | 6.53 |  | 63.53 | 4.16 |  | -3.567 | 0.0004 |  | 1.448 | 0.079 |  | 17.201 | 0.000 |
| Role function | 62.34 | 5.38 |  | 67.52 | 2.61 |  | -11.557 | 0.000 |  | | 62.19 | 5.12 |  | 63.28 | 4.26 |  | -2.183 | 0.0303 |  | 0.269 | 0.787 |  | 11.322 | 0.000 |
| Social function | 64.61 | 5.51 |  | 71.23 | 3.86 |  | -13.128 | 0.000 |  | | 64.89 | 6.16 |  | 65.59 | 4.37 |  | -1.236 | 0.217 |  | 0.651 | 0.069 |  | 12.905 | 0.000 |
| Cognitive function | 52.48 | 4.87 |  | 62.93 | 2.85 |  | -24.708 | 0.000 |  | | 52.43 | 5.26 |  | 54.68 | 3.74 |  | -4.651 | 0.0001 |  | 0.925 | 0.153 |  | 23.408 | 0.000 |
| Emotional function | 61.15 | 5.67 |  | 71.46 | 3.82 |  | -20.119 | 0.000 |  | | 60.58 | 6.16 |  | 62.53 | 3.67 |  | -3.628 | 0.0003 |  | 0.924 | 0.356 |  | 22.490 | 0.000 |
| Overall quality of life | 63.29 | 5.17 |  | 74.56 | 3.97 |  | -23.067 | 0.000 |  | | 63.81 | 5.42 |  | 63.51 | 3.72 |  | 0.609 | 0.543 |  | 0.355 | 0.265 |  | 22.097 | 0.000 |
| **BN= before nursing; AN=after nursing** | | | | | | | | | | | | | | | | | | | | | | | | |
