# Supplementary material for: Improving Quality of Life, Mental Health, and Reducing Complications in Nasopharyngeal Carcinoma Patients Undergoing Chemoradiotherapy: A Randomized Controlled Trial of the Omaha System Nursing Model
Source: Research Square preprint supplement (doi:10.21203/rs.3.rs-6354392/v1), 2025-06-02
Supplement: Supplementary file 4 [file e08b328873d47dc12c1cbf24.docx]

| **Table 3. Comparison of mental state scores between the two groups before and after nursing (x ̅± s)** | | | | | | | | | | | | | | | | | | | | | | | | |
| --- | --- | --- | --- | --- | --- | --- | --- | --- | --- | --- | --- | --- | --- | --- | --- | --- | --- | --- | --- | --- | --- | --- | --- | --- |
| **Mental state** | **Experimental group(n=178)** | | | | | | | |  | **Control group(n=178)** | | | | | | | | |  | **Between groups** | | | | |
| BN1 | |  | AN1 | |  | Within group | |  | BN2 | |  | AN2 | |  | Within group | | |  | BN1 Experimental vs. BN2 Control | |  | AN1 Experimental vs. AN2 Control | |
| Mean | SD |  | Mean | SD |  | *t* | P |  | Mean | SD |  | Mean | SD |  | *t* | P | |  | *t* | P |  | *t* | P |
| Somatization | 1.63 | 0.26 |  | 1.21 | 0.29 |  | 14.386 | 0.000 |  | 1.61 | 0.29 |  | 1.64 | 0.31 |  | -0.942 | | 0.347 |  | 0.685 | 0.494 |  | -13.514 | 0.000 |
| Interpersonal sensitivity | 1.94 | 0.37 |  | 1.59 | 0.42 |  | 8.342 | 0.000 |  | 1.89 | 0.32 |  | 1.93 | 0.51 |  | -0.886 | 0.376 | |  | 1.363 | 0.174 |  | -5.086 | 0.000 |
| Depressed | 1.82 | 0.16 |  | 1.36 | 0.45 |  | 12.850 | 0.000 |  | 1.85 | 0.21 |  | 1.84 | 0.27 |  | 0.390 | 0.697 | |  | -1.516 | 0.131 |  | -12.203 | 0.000 |
| Anxious | 1.86 | 0.43 |  | 1.31 | 0.27 |  | 14.452 | 0.000 |  | 1.82 | 0.39 |  | 1.83 | 0.29 |  | 0.275 | 0.784 | |  | 0.919 | 0.359 |  | -17.509 | 0.000 |
| Terror | 1.89 | 0.58 |  | 1.24 | 0.58 |  | 10.572 | 0.000 |  | 1.84 | 0.63 |  | 1.63 | 0.30 |  | 4.015 | 0.001 | |  | 0.779 | 0.437 |  | -13.131 | 0.000 |
| Hostile | 1.96 | 0.92 |  | 1.27 | 0.61 |  | 8.339 | 0.000 |  | 1.92 | 0.87 |  | 1.96 | 0.73 |  | -0.469 | 0.639 | |  | 0.421 | 0.673 |  | -9.676 | 0.000 |
| Force | 1.82 | 0.26 |  | 1.26 | 0.30 |  | 18.820 | 0.000 |  | 1.84 | 0.22 |  | 1.76 | 0.28 |  | 1.646 | 0.101 | |  | -0.783 | 0.434 |  | -16.255 | 0.000 |
| Paranoid | 1.95 | 0.63 |  | 1.37 | 0.46 |  | 9.919 | 0.000 |  | 1.97 | 0.33 |  | 1.78 | 0.61 |  | 3.655 | 0.001 | |  | -0.375 | 0.707 |  | -7.159 | 0.000 |
| Psychotic | 1.72 | 0.39 |  | 1.13 | 0.42 |  | 13.734 | 0.000 |  | 1.68 | 0.35 |  | 1.42 | 0.39 |  | 6.619 | 0.0000 | |  | 1.018 | 0.309 |  | -6.750 | 0.000 |
| **BN= before nursing;AN=after nursing** | | | | | | | | | | | | | | | | | | | | | | | | |
